# Supplementary material for: Assessing the Occurrence of Host-Specific Faecal Indicator Markers in Water Systems as a Function of Water, Sanitation and Hygiene Practices: A Case Study in Rural Communities of Vhembe District Municipality, South Africa
Source: MDPI journal article supplement (doi:10.3390/pathogens13010016), 2023-12-23
Supplement: s1 [file s1]

## Supplementary S1: Survey questionnaire

Date: \_\_\_\_\_

Name of Interviewer: \_\_\_\_\_

Name of Municipality and Village: \_\_\_\_\_

Household ID: \_\_\_\_\_

Language used for interview: \_\_\_\_\_

### 1. Socio-demography

|                                                                                                                                                                   |  |                             |  |
|-------------------------------------------------------------------------------------------------------------------------------------------------------------------|--|-----------------------------|--|
| 1.1 Age                                                                                                                                                           |  | 1.2 Gender                  |  |
| 1.3 Number of family members                                                                                                                                      |  |                             |  |
| 1.4 Adult female(s)                                                                                                                                               |  | Adult male(s)               |  |
|                                                                                                                                                                   |  | Children 17 years and below |  |
| 1.5 Age of members above<br><div style="display: flex; justify-content: space-between;"> <span>a. _____</span> <span>b. _____</span> <span>c. _____</span> </div> |  |                             |  |
| 1.6 How many family members are employed?                                                                                                                         |  |                             |  |
| 1.7 How many family members have passed matric?                                                                                                                   |  |                             |  |
| 1.8 How many family members have tertiary education?                                                                                                              |  |                             |  |
| 1.9 What is the monthly household income?                                                                                                                         |  |                             |  |
| R5000 and less                                                                                                                                                    |  | Range between R5000-R10 000 |  |
|                                                                                                                                                                   |  | R10 000 and more            |  |
| 1.10 How much do you spend on household cleaning agents monthly?                                                                                                  |  |                             |  |

### 2. Water sources

2.1 What is the water source in your community?

|                                                                 |  |              |  |                        |  |       |  |
|-----------------------------------------------------------------|--|--------------|--|------------------------|--|-------|--|
| Ponds                                                           |  | River/Stream |  | Dam                    |  | Other |  |
| 2.2 Is the water source protected from any trespassing animals? |  |              |  |                        |  |       |  |
| Yes                                                             |  |              |  | No                     |  |       |  |
| 2.3 If no, specify which animals?                               |  |              |  |                        |  |       |  |
| 2.4 What is the source of potable water for your household?     |  |              |  |                        |  |       |  |
| Tap in the yard                                                 |  |              |  | Municipal communal tap |  |       |  |
|                                                                 |  |              |  | Other                  |  |       |  |

|                                         |  |              |  |            |  |              |  |
|-----------------------------------------|--|--------------|--|------------|--|--------------|--|
| 2.5 Who fetches water for everyday use? |  |              |  |            |  |              |  |
| Adult male                              |  | Adult female |  | Young male |  | Young female |  |

2.6 Do you engage in leisure activities at the river/dam?

|         |  |          |  |            |  |    |  |
|---------|--|----------|--|------------|--|----|--|
| Fishing |  | Swimming |  | Boat rides |  | No |  |
|---------|--|----------|--|------------|--|----|--|

### 3. Storage of water

3.1 Distance of water source from household

|               |  |         |  |           |  |         |  |
|---------------|--|---------|--|-----------|--|---------|--|
| Less than 10m |  | 10-500m |  | 500-1000m |  | 1000m + |  |
|---------------|--|---------|--|-----------|--|---------|--|

3.2 Do you store the water?

|     |  |    |  |
|-----|--|----|--|
| Yes |  | No |  |
|-----|--|----|--|

3.3 If yes, which containers do you use for water storage?

.....

3.4 How long is the water stored?

|                 |  |            |  |        |  |       |  |
|-----------------|--|------------|--|--------|--|-------|--|
| Less than a day |  | A few days |  | A week |  | Other |  |
|-----------------|--|------------|--|--------|--|-------|--|

3.5 Where are the water storage containers kept?

|                  |  |                   |  |
|------------------|--|-------------------|--|
| Inside the house |  | Outside the house |  |
|------------------|--|-------------------|--|

3.6 How do you keep the containers?

|             |  |               |  |
|-------------|--|---------------|--|
| Always open |  | Always closed |  |
|-------------|--|---------------|--|

3.7 How often do you wash the containers?

|       |  |              |  |                                |  |
|-------|--|--------------|--|--------------------------------|--|
| Never |  | Once a month |  | Before each collection/storage |  |
|-------|--|--------------|--|--------------------------------|--|

3.8 How do you withdraw water from the storage container?

|                                  |  |                                |  |
|----------------------------------|--|--------------------------------|--|
| By immersing a household utensil |  | Use storage container with tap |  |
|----------------------------------|--|--------------------------------|--|

Other: .....

3.9 Does your household get enough water for everyday use?

|     |  |    |  |
|-----|--|----|--|
| Yes |  | No |  |
|-----|--|----|--|

3.10 If No, what is the reason for that?

.....

#### 4. Water treatment

4.1. Do you treat the water before usage?

|     |  |    |  |
|-----|--|----|--|
| Yes |  | No |  |
|-----|--|----|--|

4.2 If Yes, how is the water treated?

|         |  |           |  |            |  |       |  |
|---------|--|-----------|--|------------|--|-------|--|
| Boiling |  | Bleaching |  | Alum stone |  | Other |  |
|---------|--|-----------|--|------------|--|-------|--|

4.3 If No why?

.....

.....

#### 5. Source of faecal pollution

5.1 Do you have a toilet in the yard?

|     |  |    |  |
|-----|--|----|--|
| Yes |  | No |  |
|-----|--|----|--|

5.2 If Yes, what type of sanitation facility is it?

|          |  |             |  |            |  |               |  |
|----------|--|-------------|--|------------|--|---------------|--|
| Flushing |  | Pit latrine |  | VIP toilet |  | Bucket system |  |
|----------|--|-------------|--|------------|--|---------------|--|

Other: .....

5.3 If No, where do you relieve yourself?

|           |  |            |  |                  |  |                 |  |
|-----------|--|------------|--|------------------|--|-----------------|--|
| Open area |  | In streams |  | Neighbour toilet |  | Communal toilet |  |
|-----------|--|------------|--|------------------|--|-----------------|--|

5.4 Does the sanitation facility have a handwash basin?

|     |  |    |  |
|-----|--|----|--|
| Yes |  | No |  |
|-----|--|----|--|

5.5 Do you have animals around your water sources?

|     |  |    |  |
|-----|--|----|--|
| Yes |  | No |  |
|-----|--|----|--|

5.6 If yes, which type of animals?

.....

5.7 Do you have crops around your water sources?

|     |  |    |  |
|-----|--|----|--|
| Yes |  | No |  |
|-----|--|----|--|

5.8 If yes, what type of crops?

.....

5.9 Do children under the age of 5 use this toilet?

|     |  |    |  |
|-----|--|----|--|
| Yes |  | No |  |
|-----|--|----|--|

5.10 If No; why not?

|               |  |              |  |                |  |
|---------------|--|--------------|--|----------------|--|
| It's not safe |  | It's too far |  | It's too dirty |  |
|---------------|--|--------------|--|----------------|--|

Other: .....

## 6. Health

6.1 When do you wash your hands?

|                  |  |                    |  |                      |  |                           |  |              |  |                                         |  |
|------------------|--|--------------------|--|----------------------|--|---------------------------|--|--------------|--|-----------------------------------------|--|
| After toilet use |  | After nappy change |  | After animal contact |  | Before food preparation s |  | Before meals |  | After house chores and rubbish disposal |  |
|------------------|--|--------------------|--|----------------------|--|---------------------------|--|--------------|--|-----------------------------------------|--|

Other.....

6.2 Do you use soap to wash hands?

|     |  |    |  |
|-----|--|----|--|
| Yes |  | No |  |
|-----|--|----|--|

6.3 If No, why not?

|                 |  |                     |  |
|-----------------|--|---------------------|--|
| Can't afford it |  | Don't see the point |  |
|-----------------|--|---------------------|--|

6.4 What are the frequently occurring health issues in the household?

|                          |  |                          |  |                                   |  |                 |  |
|--------------------------|--|--------------------------|--|-----------------------------------|--|-----------------|--|
| Bilharzia (bloody urine) |  | Diarrhoea (loose stools) |  | Impetigo (Infectious skin rashes) |  | Worms in faeces |  |
|--------------------------|--|--------------------------|--|-----------------------------------|--|-----------------|--|

6.5 If diarrhoea; does it happen to children under age 5?

|                    |  |    |  |
|--------------------|--|----|--|
| Yes                |  | No |  |
| If Yes; how often? |  |    |  |

6.6 Does it occur in persons over 65?

|                    |  |    |  |
|--------------------|--|----|--|
| Yes                |  | No |  |
| If Yes; how often? |  |    |  |

6.7 What is the nature of the stool of the infected person?

|        |  |              |  |        |  |
|--------|--|--------------|--|--------|--|
| Watery |  | Mucopurulent |  | Bloody |  |
|--------|--|--------------|--|--------|--|

6.8 What is done with the sick person?

|         |  |               |  |                    |  |                      |  |
|---------|--|---------------|--|--------------------|--|----------------------|--|
| Nothing |  | Self-medicate |  | Traditional healer |  | Clinic/health centre |  |
|---------|--|---------------|--|--------------------|--|----------------------|--|

6.9 Are there any quarantine measures for the convalescent individual?

|     |  |    |  |
|-----|--|----|--|
| Yes |  | No |  |
|-----|--|----|--|

If Yes; explain briefly

.....

.....

**Thank you!**
